# Supplementary material
Source: PubMed Central journal article supplement (PMC8899400)
Supplement: mmc1.pdf [file mmc1.pdf]

**Supplemental information**

**SARS-CoV-2 variant B.1.1.7 caused**

**HLA-A2<sup>+</sup> CD8<sup>+</sup> T cell epitope mutations**

**for impaired cellular immune response**

**Chanchan Xiao, Lipeng Mao, Zhigang Wang, Lijuan Gao, Guodong Zhu, Jun Su, Xiongfei Chen, Jun Yuan, Yutian Hu, Zhinan Yin, Jun Xie, Weiqing Ji, Haitao Niu, Feng Gao, Oscar Junhong Luo, Lianbo Xiao, Pengcheng Wang, and Guobing Chen**

Supplementary Figures

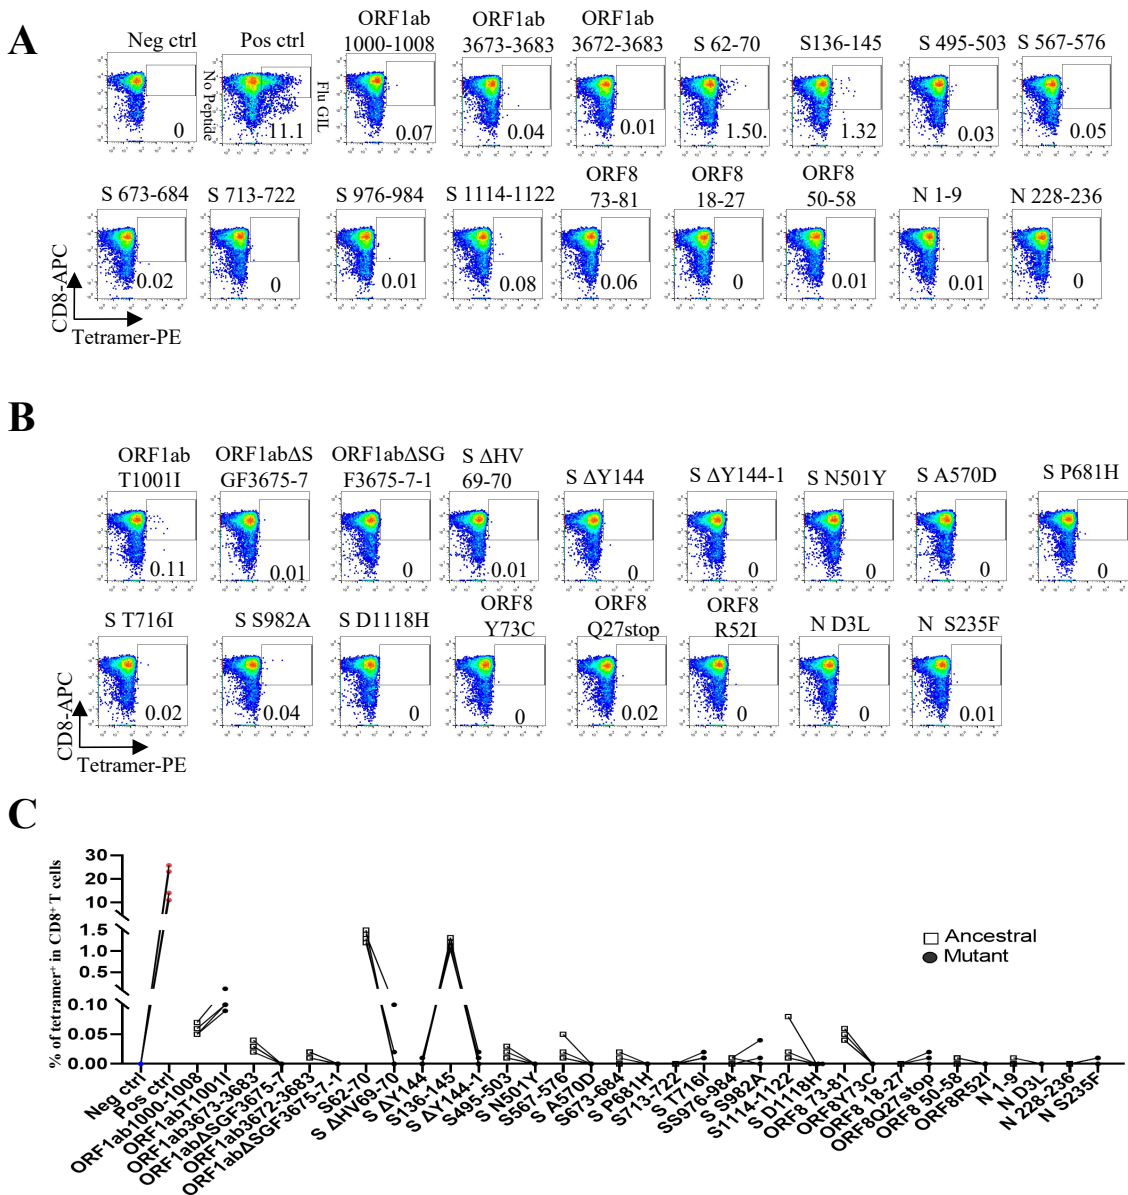

**Figure S1** Identification of immunogenicity of HLA-A2 restricted T cell epitope of SARS-CoV-2 variant B.1.1.7. Related to Figure 2D.

Mitomycin pretreated T2A2 cells were loaded with mixed peptides from ancestral or mutant, and incubated with CD8<sup>+</sup> T cell from health donors at 1:1 ratio, respectively. Epitope specific CD8<sup>+</sup> T cells were generated after 7 day stimulation. A-C: In the same healthy volunteers, the ancestral (A) and mutated (B) epitopes near the mutation site stimulated healthy CD8<sup>+</sup> T cells to generate antigen-specific T cells for 7 days. C was the representative plot of A and B (Symbols represent individual person, n = 4 per group). Ancestral: Wuhan strain epitope; Mutant: varian B.1.1.7 epitope. Neg ctrl: T2A2 without peptide loading; Pos ctrl: T2A2 loaded with influenza A M1 peptide GILGFVFTL.

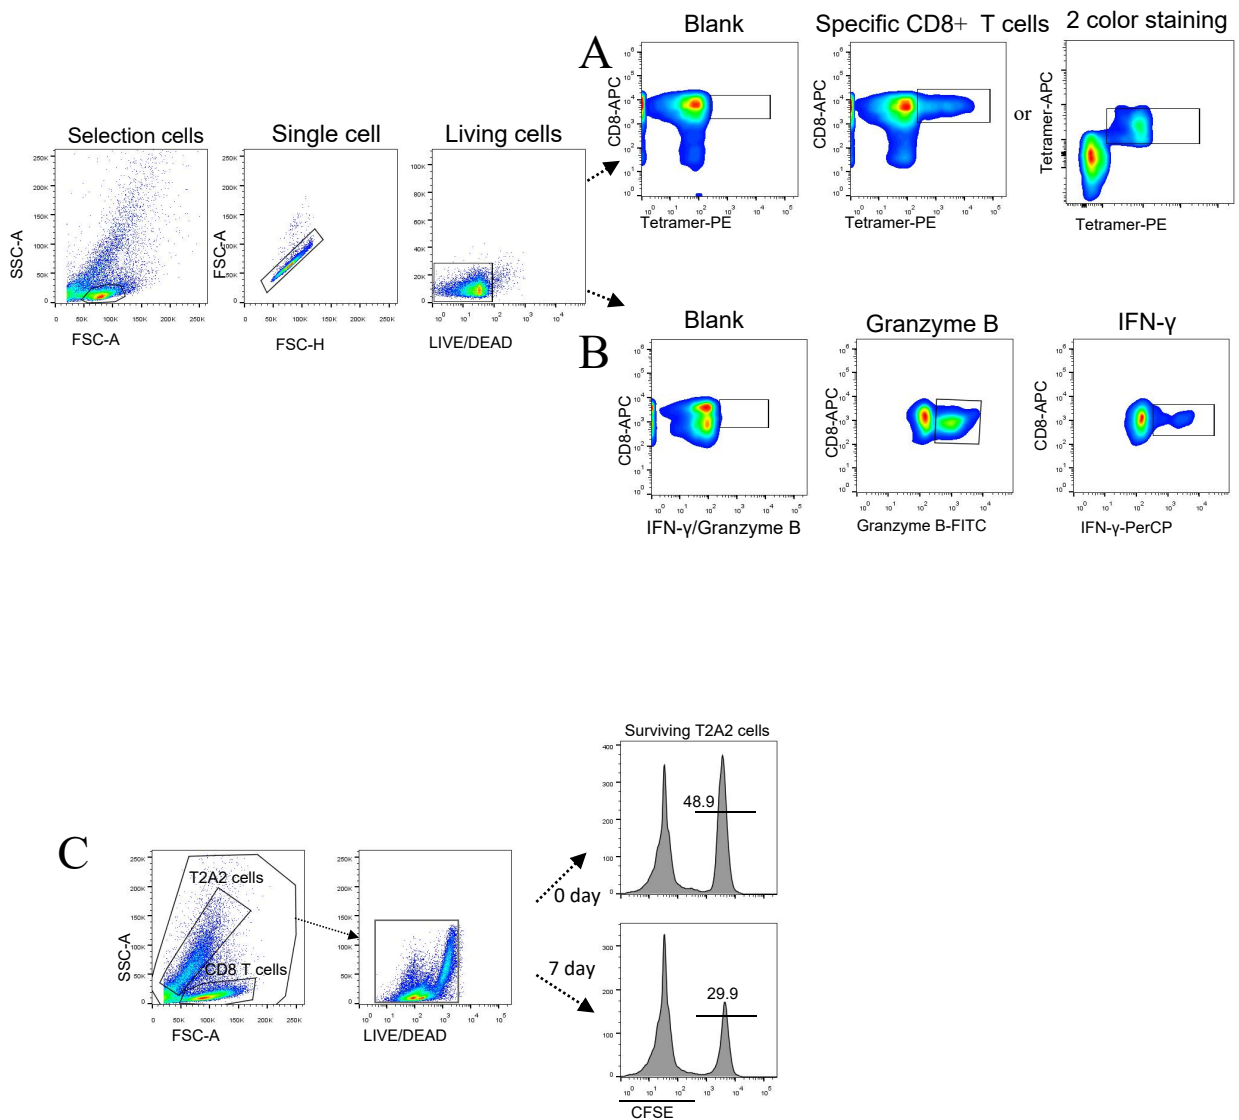

**Figure S2** Visualization of representative flow cytometry data and gating strategy. Related to Figure 2,3.

- (A) MHC tetramer staining of human CD8<sup>+</sup> T cells.
- (B) Intracellular cytokine (IFN- $\gamma$  and Granzyme B) staining.
- (C) Stimulated T cell-mediated T2A2 killing staining.

## Supplementary Tables

**Table S1** Raw data of predicted CD8<sup>+</sup> T cell epitopes for SARS-CoV-2 variant B.1.1.7. Related to STAR Methods.

| Protein | Allele       | Start | End  | Length | Sequence         | Rank         | ann_ic<br>50 | ann_ra<br>nk | smm_ic<br>50 | smm_r<br>ank |
|---------|--------------|-------|------|--------|------------------|--------------|--------------|--------------|--------------|--------------|
| ORF1ab  | HLA-A<br>*02 | 1000  | 1008 | 9      | TTIQTIVEV        | 1.39         | 22.3         | 0.27         | 77.37        | 2.5          |
|         | HLA-A<br>*02 | 1707  | 1716 | 10     | AANFCALILA       | 9.55         | 359.03       | 2.1          | 1210.35      | 17           |
|         | HLA-A<br>*02 | 2225  | 2234 | 10     | KLINIIWFL        | 0.13         | 7.29         | 0.05         | 6.45         | 0.2          |
|         | HLA-A<br>*02 | 2230  | 2238 | 9      | IIFWLLLSV        | 0.4          | 19.01        | 0.21         | 18.84        | 0.4          |
|         | HLA-A<br>*02 | 3673  | 3683 | 11     | SLSGFKLKDCV      | 4.55         | 2410.71      | 7.7          | 166.31       | 1.4          |
|         | HLA-A<br>*02 | 3672  | 3683 | 12     | TLSLGFKLKDC<br>V | 9.4          | 3380.3       | 9.4          | -            | -            |
| Spike   | HLA-A<br>*02 | 62    | 70   | 9      | VTWFHAIHV        | 1.02         | 74.83        | 0.75         | 37.89        | 1.3          |
|         | HLA-A<br>*02 | 136   | 145  | 10     | CNDPFLGVYY       | 43           | 25302.0<br>5 | 44           | 21952.3      | 42           |
|         | HLA-A<br>*02 | 495   | 503  | 9      | YGFQPTNGV        | 2.6          | 736.15       | 3.2          | 59.23        | 2            |
|         | HLA-A<br>*02 | 567   | 576  | 10     | RDIADTTDAV       | 0.03         | 845          | 8            | -            | 2.5          |
|         | HLA-A<br>*02 | 673   | 684  | 12     | SYQTQTNSPRR<br>A | 14306<br>.68 | 28           | -            | -            | -            |
|         | HLA-A<br>*02 | 713   | 722  | 10     | AIPTNFTISV       | 1.4          | 118.96       | 1.2          | 89.93        | 1.6          |
|         | HLA-A<br>*02 | 976   | 984  | 9      | VLNDILSRL        | 1.1          | 33.57        | 0.38         | 58.36        | 1.1          |
|         | HLA-A<br>*02 | 1114  | 1122 | 9      | IITDNTFV         | 2.35         | 131.91       | 1.3          | 104.6        | 3.4          |
| ORF8    | HLA-A<br>*02 | 73    | 81   | 9      | YIDIGNYTV        | 0.957<br>895 | 0.01         | -            | -            | -            |
|         | HLA-A<br>*02 | 18    | 27   | 10     | QECSLQSQCTQ      | 1.50E<br>-05 | 84           | -            | -            | -            |
|         | HLA-A<br>*02 | 50    | 58   | 9      | GARKSAPLI        | 0.004<br>488 | 15           | -            | -            | -            |
| N       | HLA-A<br>*02 | 1     | 9    | 9      | MSDNGPQNQ        | 0.000<br>733 | 22           | -            | -            | -            |
|         | HLA-A<br>*02 | 228   | 236  | 9      | NQLESKMSG        | 14           | 7010.51      | 16           | 462.97       | 12           |

**Table S2** Clinical characteristics of convalescent COVID-19 patients. Related to Figure 4.

| Donor code | SARS CoV-2 PCR | Data of sample collection | Sex    | Age | HLA-A2 restriction | Symptoms | % of tetramer+ cells |        |           |          |           |          |
|------------|----------------|---------------------------|--------|-----|--------------------|----------|----------------------|--------|-----------|----------|-----------|----------|
|            |                |                           |        |     |                    |          | ORF1ab               | ORF1ab | ORF1ab    | ORF1ab   | ORF1ab    | ORF1ab   |
|            |                |                           |        |     |                    |          | 1707-1716            | A1708D | 2225-2234 | I2230T-1 | 2230-2238 | I2230T-2 |
| Case 1     | Positive       | Apr12, 2020               | Male   | 54  | Yes                | -        | 7.32                 | 4.24   | 38.7      | 15.8     | 8.29      | 5.84     |
| Case 2     | Positive       | May 20, 2020              | Female | 31  | No                 | -        | -                    | -      | -         | -        | -         | -        |
| Case 3     | Positive       | May 20, 2020              | Female | 38  | No                 | -        | -                    | -      | -         | -        | -         | -        |
| Case 4     | Positive       | May 20, 2020              | Female | 53  | No                 | -        | -                    | -      | -         | -        | -         | -        |
| Case 5     | Positive       | June 8, 2020              | Male   | 50  | No                 | -        | -                    | -      | -         | -        | -         | -        |
| Case 6     | Positive       | June 8, 2020              | Female | 23  | No                 | -        | -                    | -      | -         | -        | -         | -        |
| Case 7     | Positive       | June 17, 2020             | Male   | 35  | No                 | -        | -                    | -      | -         | -        | -         | -        |
| Case 8     | Positive       | June 17, 2020             | Male   | 30  | No                 | -        | -                    | -      | -         | -        | -         | -        |
| Case 9     | Positive       | June 17, 2020             | Male   | 31  | No                 | -        | -                    | -      | -         | -        | -         | -        |
| Case 10    | Positive       | June 17, 2020             | Male   | 29  | No                 | -        | -                    | -      | -         | -        | -         | -        |
| Case 11    | Positive       | June 17, 2020             | Male   | 35  | No                 | -        | -                    | -      | -         | -        | -         | -        |
| Case 12    | Positive       | Sept 19, 2020             | Male   | 64  | No                 | Mild     | -                    | -      | -         | -        | -         | -        |
| Case 13    | Positive       | Sept 19, 2020             | Female | 54  | No                 | Mild     | -                    | -      | -         | -        | -         | -        |
| Case 14    | Positive       | Sept 19, 2020             | Female | 63  | No                 | Mild     | -                    | -      | -         | -        | -         | -        |
| Case 15    | Positive       | Oct 18, 2020              | Female | 66  | No                 | Mild     | -                    | -      | -         | -        | -         | -        |
| Case 16    | Positive       | Oct 18, 2020              | Female | 57  | Yes                | Mild     | 4.28                 | 3.04   | 9.67      | 7.97     | 7.17      | 6.48     |
| Case17     | Positive       | Oct 18, 2020              | Female | 54  | Yes                | Mild     | 3.49                 | 3.22   | 11.2      | 10.3     | 7.7       | 5.32     |
| Case 18    | Positive       | Oct 23, 2020              | Male   | 61  | No                 | Mild     | -                    | -      | -         | -        | -         | -        |
| Case 19    | Positive       | Oct 23, 2020              | Female | 57  | Yes                | Mild     | 3.69                 | 2.94   | 10.2      | 7.06     | 8.37      | 6.2      |
| Case 20    | Positive       | Nov 9, 2020               | Female | 74  | No                 | Mild     | -                    | -      | -         | -        | -         | -        |
| Case 21    | Positive       | Nov 9, 2020               | Female | 64  | No                 | Mild     | -                    | -      | -         | -        | -         | -        |
| Case 22    | Positive       | Nov 9, 2020               | Female | 49  | No                 | Mild     | -                    | -      | -         | -        | -         | -        |
| Case 23    | Positive       | Dec 6, 2020               | Female | 77  | No                 | Severe   | -                    | -      | -         | -        | -         | -        |
| Case 24    | Positive       | Dec 6, 2020               | Male   | 60  | No                 | Severe   | -                    | -      | -         | -        | -         | -        |
| Case 25    | Positive       | Dec 17, 2020              | Female | 65  | No                 | Severe   | -                    | -      | -         | -        | -         | -        |

**Table S3** Clinical characteristics of SARS-CoV-2 vaccinees. Related to Figure 5.

| Donor code | HLA-A2 restriction | Sex    | Age | BMI (kg/m <sup>2</sup> ) | First vaccination time | Time for booster immunization | Blood collection time | Symptoms                   |
|------------|--------------------|--------|-----|--------------------------|------------------------|-------------------------------|-----------------------|----------------------------|
| # 1        | Yes                | Female | 22  | 19.83                    | Sept 3, 2020           | Sept 25, 2020                 | Jan 23, 2021          | NO                         |
| # 2        | NO                 | Female | 40  | 23.43                    | Sept 3, 2020           | Sept 25, 2020                 | Jan 23, 2021          | NO                         |
| # 3        | NO                 | Female | 32  | 20.82                    | Sept 3, 2020           | Sept 25, 2020                 | Jan 23, 2021          | NO                         |
| # 4        | Yes                | Female | 36  | 18.49                    | Sept 3, 2020           | Sept 25, 2020                 | Jan 23, 2021          | NO                         |
| # 5        | NO                 | Female | 21  | 16.90                    | Sept 3, 2020           | Sept 25, 2020                 | Jan 23, 2021          | NO                         |
| # 6        | NO                 | Female | 23  | 17.63                    | Sept 3, 2020           | Sept 25, 2020                 | Jan 23, 2021          | NO                         |
| # 7        | NO                 | Female | 42  | 25.39                    | Sept 3, 2020           | Sept 25, 2020                 | Jan 23, 2021          | Slight fatigue             |
| # 8        | NO                 | Female | 45  | 31.25                    | Sept 3, 2020           | Sept 25, 2020                 | Jan 23, 2021          | NO                         |
| # 9        | NO                 | Female | 30  | 22.31                    | Sept 3, 2020           | Sept 25, 2020                 | Jan 23, 2021          | NO                         |
| # 10       | Yes                | Female | 33  | 20.57                    | Sept 3, 2020           | Sept 25, 2020                 | Jan 23, 2021          | NO                         |
| # 11       | NO                 | Male   | 29  | 22.34                    | Sept 3, 2020           | Sept 25, 2020                 | Jan 23, 2021          | NO                         |
| # 12       | NO                 | Male   | 23  | 28.04                    | Sept 3, 2020           | Sept 25, 2020                 | Jan 23, 2021          | NO                         |
| # 13       | Yes                | Female | 51  | 25.63                    | Sept 3, 2020           | Sept 25, 2020                 | Jan 23, 2021          | Local redness and swelling |
| # 14       | Yes                | Male   | 55  | 25.35                    | Sept 3, 2020           | Sept 25, 2020                 | Jan 23, 2021          | NO                         |
| # 15       | NO                 | Female | 24  | 21.89                    | Sept 3, 2020           | Sept 25, 2020                 | Jan 23, 2021          | NO                         |
| # 16       | NO                 | Female | 27  | 23.80                    | Sept 3, 2020           | Sept 25, 2020                 | Jan 23, 2021          | NO                         |
| # 17       | NO                 | Male   | 24  | 28.41                    | Sept 3, 2020           | Sept 25, 2020                 | Jan 23, 2021          | NO                         |
| # 18       | Yes                | Male   | 58  | 22.49                    | Sept 3, 2020           | Sept 25, 2020                 | Jan 23, 2021          | NO                         |
| # 19       | NO                 | Female | 54  | 25.76                    | Sept 3, 2020           | Sept 25, 2020                 | Jan 23, 2021          | NO                         |
| # 20       | NO                 | Female | 57  | 21.09                    | Sept 3, 2020           | Sept 25, 2020                 | Jan 23, 2021          | NO                         |
| # 21       | NO                 | Male   | 31  | 23.36                    | Sept 3, 2020           | Sept 25, 2020                 | Jan 23, 2021          | NO                         |
| # 22       | NO                 | Female | 33  | 27.40                    | Sept 3, 2020           | Sept 25, 2020                 | Jan 23, 2021          | Slight dizziness           |
| # 23       | Yes                | Female | 28  | 20.76                    | Sept 3, 2020           | Sept 25, 2020                 | Jan 23, 2021          | NO                         |
| # 24       | Yes                | Female | 53  | 20.43                    | Sept 3, 2020           | Sept 25, 2020                 | Jan 23, 2021          | Slight dizziness           |
| # 25       | NO                 | Male   | 27  | 20.04                    | Sept 25, 2020          | Sept 25, 2020                 | Jan 23, 2021          | NO                         |
| # 26       | NO                 | Female | 28  | 18.07                    | Sept 25, 2020          | Oct 20, 2020                  | Jan 23, 2021          | NO                         |
| # 27       | NO                 | Female | 36  | 22.03                    | Sept 25, 2020          | Sept 25, 2020                 | Jan 23, 2021          | NO                         |
| # 28       | Yes                | Male   | 21  | 22.49                    | Dec 23, 2020           | Jan 18, 2021                  | Jan 23, 2021          | NO                         |
| # 25       | NO                 | Female | 46  | 21.48                    | Sept 25, 2020          | Oct 20, 2020                  | Jan 23, 2021          | NO                         |
| # 26       | NO                 | Male   | 35  | 23.56                    | Sept 25, 2020          | Sept 25, 2020                 | Jan 23, 2021          | NO                         |
| # 27       | NO                 | Male   | 25  | 22.60                    | Sept 25, 2020          | Sept 25, 2020                 | Jan 23, 2021          | NO                         |
| # 28       | NO                 | Male   | 42  | 24.22                    | Sept 25, 2020          | Sept 25, 2020                 | Jan 23, 2021          | NO                         |
| # 30       | NO                 | Female | 40  | 22.27                    | Sept 25, 2020          | Sept 25, 2020                 | Jan 23, 2021          | NO                         |
| # 31       | Yes                | Male   | 22  | 23.39                    | Dec 23, 2020           | Jan 18, 2021                  | Jan 23, 2021          | NO                         |
| # 32       | NO                 | Male   | 40  | 24.09                    | Sept 3, 2020           | Sept 25, 2020                 | Jan 23, 2021          | NO                         |
| # 33       | NO                 | Female | 22  | 23.03                    | Sept 3, 2020           | Sept 25, 2020                 | Jan 23, 2021          | NO                         |
| # 34       | NO                 | Female | 43  | 23.79                    | Sept 3, 2020           | Sept 25, 2020                 | Jan 23, 2021          | NO                         |
| # 35       | NO                 | Male   | 56  | 27.68                    | Sept 3, 2020           | Sept 25, 2020                 | Jan 23, 2021          | NO                         |
| # 36       | Yes                | Male   | 38  | 24.42                    | Dec 24, 2020           | Jan 18, 2021                  | Jan 23, 2021          | NO                         |

|      |     |        |    |        |               |               |              |    |
|------|-----|--------|----|--------|---------------|---------------|--------------|----|
| # 37 | NO  | Female | 46 | 27.34  | Dec 24, 2020  | Jan 18, 2021  | Jan 23, 2021 | NO |
| # 38 | NO  | Female | 52 | 25.88  | Sept 3, 2020  | Sept 25, 2020 | Jan 23, 2021 | NO |
| # 39 | NO  | Female | 23 | 18.83  | Sept 3, 2020  | Sept 25, 2020 | Jan 23, 2021 | NO |
| # 40 | NO  | Female | 26 | 24.80  | Sept 3, 2020  | Sept 25, 2020 | Jan 23, 2021 | NO |
| # 41 | NO  | Female | 41 | 31.25  | Sept 3, 2020  | Sept 25, 2020 | Jan 23, 2021 | NO |
| # 42 | NO  | Female | 46 | 21.87  | Sept 3, 2020  | Sept 25, 2020 | Jan 23, 2021 | NO |
| # 43 | Yes | Male   | 22 | 22.94  | Dec 23, 2020  | Jan 20, 2021  | Jan 23, 2021 | NO |
| # 44 | NO  | Female | 33 | 20.57  | Dec 23, 2020  | Jan 20, 2021  | Jan 23, 2021 | NO |
| # 45 | NO  | Female | 40 | 18.98  | Dec 23, 2020  | Jan 20, 2021  | Jan 23, 2021 | NO |
| # 46 | NO  | Male   | 26 | 24.17  | Dec 23, 2020  | Jan 20, 2021  | Jan 23, 2021 | NO |
| # 47 | NO  | Female | 30 | 23.43  | Dec 23, 2020  | Jan 20, 2021  | Jan 23, 2021 | NO |
| # 48 | NO  | Female | 54 | 20.38  | Dec 23, 2020  | Jan 20, 2021  | Jan 23, 2021 | NO |
| # 49 | Yes | Female | 42 | 23.07  | Sept 25, 2020 | Sept 25, 2020 | Jan 23, 2021 | NO |
| # 50 | NO  | Female | 23 | 17.79  | Sept 25, 2020 | Sept 25, 2020 | Jan 23, 2021 | NO |
| # 51 | NO  | Female | 37 | 25.53  | Sept25, 2020  | Sept 25, 2020 | Jan 23, 2021 | NO |
| # 52 | Yes | Male   | 39 | 27.78  | Sept 25, 2020 | Sept 25, 2020 | Jan 23, 2021 | NO |
| # 53 | Yes | Female | 53 | 25.34  | Sept 25, 2020 | Sept 25, 2020 | Jan 23, 2021 | NO |
| # 54 | NO  | Female | 50 | 25.71  | Sept 25, 2020 | Sept 25, 2020 | Jan 23, 2021 | NO |
| # 55 | NO  | Female | 35 | 24.97  | Sept 25, 2020 | Sept 25, 2020 | Jan 23, 2021 | NO |
| # 56 | Yes | Female | 21 | 19..36 | Dec 23, 2020  | Jan 18, 2021  | Jan 23, 2021 | NO |
| # 57 | NO  | Female | 26 | 21.22  | Dec 23, 2020  | Jan 18, 2021  | Jan 23, 2021 | NO |
| # 58 | NO  | Female | 36 | 22.58  | Dec 23, 2020  | Jan 18, 2021  | Jan 23, 2021 | NO |
| # 59 | Yes | Male   | 43 | 23.14  | Dec 23, 2020  | Jan 18, 2021  | Jan 23, 2021 | NO |
| # 60 | NO  | Female | 54 | 27.73  | Dec 23, 2020  | Jan 18, 2021  | Jan 23, 2021 | NO |

---
